# Supplementary material
Source: MDPI journal article supplement (https://www.mdpi.com/2073-4344/11/6/698)
Supplement: s1 [file s1]

## Supporting Information

### Towards computer-aided graphene covered $\text{TiO}_2\text{-Cu}/(\text{Cu}_x\text{O}_y)$ composite design for the purpose of photoinduced hydrogen evolution

Łukasz Lewandowski <sup>1</sup>, Agnieszka Gajewicz-Skrętna <sup>2</sup>, Tomasz Klimczuk <sup>3</sup>, Grzegorz Trykowski <sup>4</sup>, Kostiantyn Nikiforov <sup>5</sup>, Wojciech Lisowski <sup>6</sup>, Anna Gołabiewska <sup>7\*</sup> and Adriana Zaleska-Medynska <sup>8</sup>

<sup>1</sup>Faculty of Chemistry, Department of Environmental Technology, University of Gdansk, ul. Wita Stwosza 63, 80-308 Gdansk, lukasz.lewandowski@phdstud.ug.edu.pl

<sup>2</sup>Laboratory of Environmental Chemometrics, Faculty of Chemistry, University of Gdansk, Wita Stwosza 63, 80-308 Gdansk, agnieszka.gajewicz@ug.edu.pl

<sup>3</sup>Department of Solid State Physics, Faculty of Applied Physics and Mathematics, Gdansk University of Technology, 80-233 Gdansk, Poland; tomasz.kliczmuk@pg.edu.pl

<sup>4</sup>Instrumental Analyses Laboratory, Faculty of Chemistry, Nicolaus Copernicus University in Torun, 87-100, Torun, Poland, tryk@chem.umk.pl

<sup>5</sup>Institute of Physical Chemistry, Polish Academy of Sciences, Laboratory of Surface Analysis, 01-224 Warszawa, knikiforov@ichf.edu.pl

<sup>6</sup>Institute of Physical Chemistry, Polish Academy of Sciences, Laboratory of Surface Analysis, 01-224 Warszawa, wlisowski@ichf.edu.pl

<sup>7</sup>Correspondence: Faculty of Chemistry, Department of Environmental Technology, University of Gdansk, ul. Wita Stwosza 63, 80-308 Gdansk, anna.golabiewska@ug.edu.pl

<sup>8</sup>Faculty of Chemistry, Department of Environmental Technology, University of Gdansk, ul. Wita Stwosza 63, 80-308 Gdansk, adriana.zaleska-medynska.ug.edu.pl

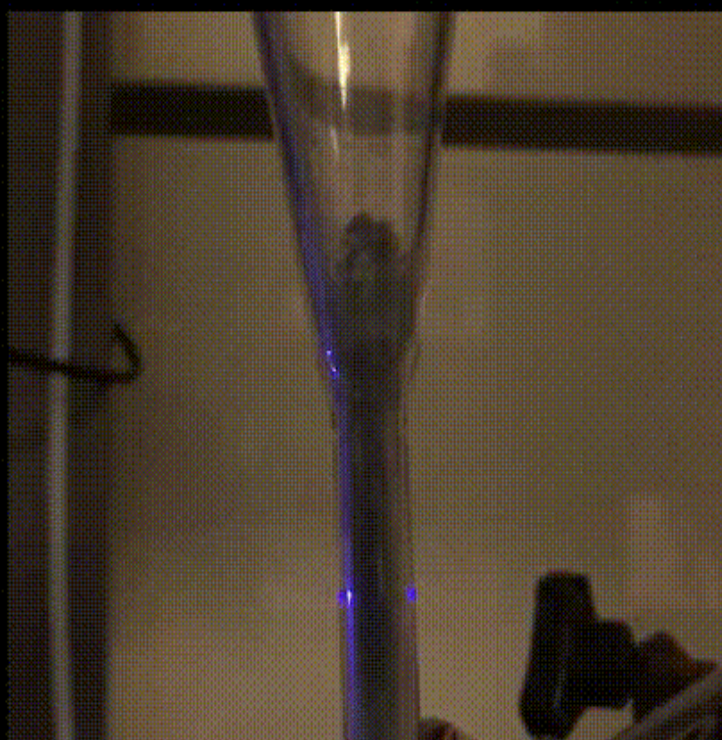

**Figure S1.** Fluidised bed.

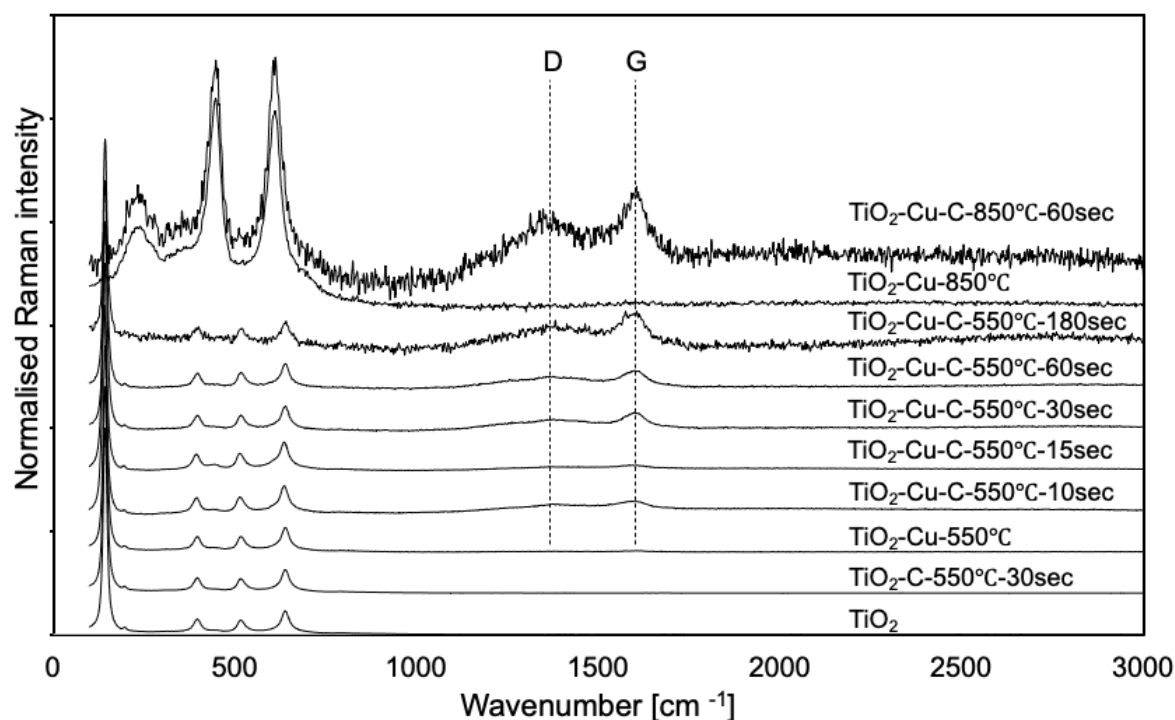

**Figure S2.** Raman spectrum of photocatalysts.

**Table S1.** Summary table of selected synthesis parameters and computational results (for the complete table with the predicted values, please refer to the supporting material).

| Sample ID                        | Synthesis temperature [°C] | Synthesis time [sec] | Measured $\text{H}_2 \text{ h}^{-1} \text{ g}_{\text{cat}}^{-1} [\mu\text{mol}]$ | Set* | Predicted $\text{H}_2 \text{ h}^{-1} \text{ g}_{\text{cat}}^{-1} [\mu\text{mol}]$ |
|----------------------------------|----------------------------|----------------------|----------------------------------------------------------------------------------|------|-----------------------------------------------------------------------------------|
| TiO <sub>2</sub> - Cu-C-550-30s  | 550                        | 30                   | 2152.17                                                                          | T    | 2117.96                                                                           |
| TiO <sub>2</sub> - Cu-C-500-30s  | 500                        | 30                   | 2151.66                                                                          | T    | 2151.66                                                                           |
| TiO <sub>2</sub> - Cu-C-550-60s  | 550                        | 60                   | 2131.11                                                                          | V    | 1756.58                                                                           |
| TiO <sub>2</sub> - Cu-C-550-30s  | 550                        | 30                   | 2108.27                                                                          | T    | 2117.96                                                                           |
| TiO <sub>2</sub> - Cu-C-550-180s | 550                        | 180                  | 2065.62                                                                          | T    | 2065.62                                                                           |
| TiO <sub>2</sub> - Cu-C-550-10s  | 550                        | 10                   | 1897.72                                                                          | V    | 1736.10                                                                           |
| TiO <sub>2</sub> - Cu-550-0s     | 550                        | 0                    | 1830.22                                                                          | T    | 1710.44                                                                           |
| TiO <sub>2</sub> - Cu-C-600-0s   | 600                        | 0                    | 1807.05                                                                          | T    | 1807.05                                                                           |
| TiO <sub>2</sub> - Cu-C-550-10s  | 550                        | 10                   | 1801.03                                                                          | V    | 1736.10                                                                           |
| TiO <sub>2</sub> - Cu-C-550-60s  | 550                        | 60                   | 1761.61                                                                          | T    | 1758.44                                                                           |
| TiO <sub>2</sub> - Cu-C-550-15s  | 550                        | 15                   | 1750.19                                                                          | T    | 1768.04                                                                           |
| TiO <sub>2</sub> - Cu-C-550-45s  | 550                        | 45                   | 1731.25                                                                          | V    | 1695.10                                                                           |
| TiO <sub>2</sub> - Cu-C-550-45s  | 550                        | 45                   | 1650.60                                                                          | T    | 1679.48                                                                           |
| TiO <sub>2</sub> - Cu-550-0s     | 550                        | 0                    | 1589.50                                                                          | T    | 1710.44                                                                           |
| TiO <sub>2</sub> - Cu-C-550-15s  | 550                        | 15                   | 1573.01                                                                          | V    | 1777.31                                                                           |
| TiO <sub>2</sub> - Cu-C-600-30s  | 600                        | 30                   | 1141.38                                                                          | T    | 1102.93                                                                           |
| TiO <sub>2</sub> - Cu-C-600-30s  | 600                        | 30                   | 1064.48                                                                          | T    | 1102.93                                                                           |

|                                 |     |    |            |          |                |
|---------------------------------|-----|----|------------|----------|----------------|
| TiO <sub>2</sub> - Cu-850-0s    | 850 | 0  | 416.46     | V        | 309.70         |
| TiO <sub>2</sub> - Cu-C-600-60s | 600 | 60 | 404.70     | T        | 404.70         |
| TiO <sub>2</sub> - Cu-850-0s    | 850 | 0  | 309.70     | T        | 309.70         |
| TiO <sub>2</sub> - Cu-C-850-60s | 850 | 60 | 29.92      | T        | 29.92          |
| TiO <sub>2</sub> - Cu-C-500-25s | 500 | 25 | <u>N/A</u> | <u>P</u> | <u>2151.66</u> |
| TiO <sub>2</sub> - Cu-C-500-35s | 500 | 35 | <u>N/A</u> | <u>P</u> | <u>2151.66</u> |
| TiO <sub>2</sub> - Cu-C-500-20s | 500 | 20 | <u>N/A</u> | <u>P</u> | <u>2151.66</u> |
| TiO <sub>2</sub> - Cu-C-500-40s | 500 | 40 | <u>N/A</u> | <u>P</u> | <u>2151.66</u> |
| TiO <sub>2</sub> - Cu-C-500-15s | 500 | 15 | <u>N/A</u> | <u>P</u> | <u>2151.65</u> |
| TiO <sub>2</sub> - Cu-C-500-45s | 500 | 45 | <u>N/A</u> | <u>P</u> | <u>2151.64</u> |
| TiO <sub>2</sub> - Cu-C-500-50s | 500 | 50 | <u>N/A</u> | <u>P</u> | <u>2151.50</u> |
| TiO <sub>2</sub> - Cu-C-500-10s | 500 | 10 | <u>N/A</u> | <u>P</u> | <u>2151.48</u> |
| TiO <sub>2</sub> - Cu-C-500-55s | 500 | 55 | <u>N/A</u> | <u>P</u> | <u>2148.64</u> |
| TiO <sub>2</sub> - Cu-C-550-25s | 550 | 25 | <u>N/A</u> | <u>P</u> | <u>2070.75</u> |
| TiO <sub>2</sub> - Cu-C-550-35s | 550 | 35 | <u>N/A</u> | <u>P</u> | <u>2055.84</u> |
| TiO <sub>2</sub> - Cu-C-500-60s | 500 | 60 | <u>N/A</u> | <u>P</u> | <u>2054.90</u> |
| TiO <sub>2</sub> - Cu-C-550-20s | 550 | 20 | <u>N/A</u> | <u>P</u> | <u>1908.35</u> |
| TiO <sub>2</sub> - Cu-C-550-40s | 550 | 40 | <u>N/A</u> | <u>P</u> | <u>1851.73</u> |
| TiO <sub>2</sub> - Cu-C-650-10s | 650 | 10 | <u>N/A</u> | <u>P</u> | <u>1783.63</u> |
| TiO <sub>2</sub> - Cu-C-700-10s | 700 | 10 | <u>N/A</u> | <u>P</u> | <u>1783.63</u> |
| TiO <sub>2</sub> - Cu-C-600-10s | 600 | 10 | <u>N/A</u> | <u>P</u> | <u>1783.63</u> |
| TiO <sub>2</sub> - Cu-C-550-70s | 550 | 70 | <u>N/A</u> | <u>P</u> | <u>1761.52</u> |
| TiO <sub>2</sub> - Cu-C-550-55s | 550 | 55 | <u>N/A</u> | <u>P</u> | <u>1732.27</u> |
| TiO <sub>2</sub> - Cu-C-550-50s | 550 | 50 | <u>N/A</u> | <u>P</u> | <u>1684.20</u> |
| TiO <sub>2</sub> - Cu-C-600-15s | 600 | 15 | <u>N/A</u> | <u>P</u> | <u>1337.64</u> |
| TiO <sub>2</sub> - Cu-C-650-15s | 650 | 15 | <u>N/A</u> | <u>P</u> | <u>1337.64</u> |
| TiO <sub>2</sub> - Cu-C-700-15s | 700 | 15 | <u>N/A</u> | <u>P</u> | <u>1337.64</u> |
| TiO <sub>2</sub> - Cu-C-600-20s | 600 | 20 | <u>N/A</u> | <u>P</u> | <u>1108.94</u> |
| TiO <sub>2</sub> - Cu-C-650-20s | 650 | 20 | <u>N/A</u> | <u>P</u> | <u>1108.94</u> |
| TiO <sub>2</sub> - Cu-C-700-20s | 700 | 20 | <u>N/A</u> | <u>P</u> | <u>1108.94</u> |
| TiO <sub>2</sub> - Cu-C-600-25s | 600 | 25 | <u>N/A</u> | <u>P</u> | <u>1103.04</u> |
| TiO <sub>2</sub> - Cu-C-650-25s | 650 | 25 | <u>N/A</u> | <u>P</u> | <u>1103.03</u> |
| TiO <sub>2</sub> - Cu-C-700-25s | 700 | 25 | <u>N/A</u> | <u>P</u> | <u>1103.03</u> |
| TiO <sub>2</sub> - Cu-C-650-30s | 650 | 30 | <u>N/A</u> | <u>P</u> | <u>1102.93</u> |
| TiO <sub>2</sub> - Cu-C-700-30s | 700 | 30 | <u>N/A</u> | <u>P</u> | <u>1102.93</u> |
| TiO <sub>2</sub> - Cu-C-600-35s | 600 | 35 | <u>N/A</u> | <u>P</u> | <u>1102.83</u> |
| TiO <sub>2</sub> - Cu-C-650-35s | 650 | 35 | <u>N/A</u> | <u>P</u> | <u>1102.83</u> |
| TiO <sub>2</sub> - Cu-C-700-35s | 700 | 35 | <u>N/A</u> | <u>P</u> | <u>1102.83</u> |
| TiO <sub>2</sub> - Cu-C-600-40s | 600 | 40 | <u>N/A</u> | <u>P</u> | <u>1096.98</u> |
| TiO <sub>2</sub> - Cu-C-650-40s | 650 | 40 | <u>N/A</u> | <u>P</u> | <u>1096.98</u> |
| TiO <sub>2</sub> - Cu-C-700-40s | 700 | 40 | <u>N/A</u> | <u>P</u> | <u>1096.98</u> |
| TiO <sub>2</sub> - Cu-C-600-45s | 600 | 45 | <u>N/A</u> | <u>P</u> | <u>870.20</u>  |
| TiO <sub>2</sub> - Cu-C-650-45s | 650 | 45 | <u>N/A</u> | <u>P</u> | <u>870.19</u>  |
| TiO <sub>2</sub> - Cu-C-700-45s | 700 | 45 | <u>N/A</u> | <u>P</u> | <u>870.19</u>  |

|                                 |     |    |            |          |               |
|---------------------------------|-----|----|------------|----------|---------------|
| TiO <sub>2</sub> - Cu-C-600-50s | 600 | 50 | <u>N/A</u> | <u>P</u> | <u>427.93</u> |
| TiO <sub>2</sub> - Cu-C-650-50s | 650 | 50 | <u>N/A</u> | <u>P</u> | <u>427.92</u> |
| TiO <sub>2</sub> - Cu-C-700-50s | 700 | 50 | <u>N/A</u> | <u>P</u> | <u>427.92</u> |
| TiO <sub>2</sub> - Cu-C-600-55s | 600 | 55 | <u>N/A</u> | <u>P</u> | <u>405.11</u> |
| TiO <sub>2</sub> - Cu-C-650-55s | 650 | 55 | <u>N/A</u> | <u>P</u> | <u>405.11</u> |
| TiO <sub>2</sub> - Cu-C-700-55s | 700 | 55 | <u>N/A</u> | <u>P</u> | <u>405.11</u> |
| TiO <sub>2</sub> - Cu-C-650-60s | 650 | 60 | <u>N/A</u> | <u>P</u> | <u>404.70</u> |
| TiO <sub>2</sub> - Cu-C-700-60s | 700 | 60 | <u>N/A</u> | <u>P</u> | <u>404.70</u> |
| TiO <sub>2</sub> - Cu-C-850-10s | 850 | 10 | <u>N/A</u> | <u>P</u> | <u>309.70</u> |
| TiO <sub>2</sub> - Cu-C-750-10s | 750 | 10 | <u>N/A</u> | <u>P</u> | <u>309.70</u> |
| TiO <sub>2</sub> - Cu-C-800-10s | 800 | 10 | <u>N/A</u> | <u>P</u> | <u>309.70</u> |
| TiO <sub>2</sub> - Cu-C-850-15s | 850 | 15 | <u>N/A</u> | <u>P</u> | <u>309.70</u> |
| TiO <sub>2</sub> - Cu-C-750-15s | 750 | 15 | <u>N/A</u> | <u>P</u> | <u>309.70</u> |
| TiO <sub>2</sub> - Cu-C-800-15s | 800 | 15 | <u>N/A</u> | <u>P</u> | <u>309.70</u> |
| TiO <sub>2</sub> - Cu-C-850-20s | 850 | 20 | <u>N/A</u> | <u>P</u> | <u>309.70</u> |
| TiO <sub>2</sub> - Cu-C-800-20s | 800 | 20 | <u>N/A</u> | <u>P</u> | <u>309.70</u> |
| TiO <sub>2</sub> - Cu-C-750-20s | 750 | 20 | <u>N/A</u> | <u>P</u> | <u>309.70</u> |
| TiO <sub>2</sub> - Cu-C-850-25s | 850 | 25 | <u>N/A</u> | <u>P</u> | <u>309.62</u> |
| TiO <sub>2</sub> - Cu-C-750-25s | 750 | 25 | <u>N/A</u> | <u>P</u> | <u>309.62</u> |
| TiO <sub>2</sub> - Cu-C-800-25s | 800 | 25 | <u>N/A</u> | <u>P</u> | <u>309.62</u> |
| TiO <sub>2</sub> - Cu-C-850-30s | 850 | 30 | <u>N/A</u> | <u>P</u> | <u>169.81</u> |
| TiO <sub>2</sub> - Cu-C-750-30s | 750 | 30 | <u>N/A</u> | <u>P</u> | <u>169.81</u> |
| TiO <sub>2</sub> - Cu-C-800-30s | 800 | 30 | <u>N/A</u> | <u>P</u> | <u>169.81</u> |
| TiO <sub>2</sub> - Cu-C-850-35s | 850 | 35 | <u>N/A</u> | <u>P</u> | <u>30.00</u>  |
| TiO <sub>2</sub> - Cu-C-750-35s | 750 | 35 | <u>N/A</u> | <u>P</u> | <u>30.00</u>  |
| TiO <sub>2</sub> - Cu-C-800-35s | 800 | 35 | <u>N/A</u> | <u>P</u> | <u>30.00</u>  |
| TiO <sub>2</sub> - Cu-C-850-40s | 850 | 40 | <u>N/A</u> | <u>P</u> | <u>29.92</u>  |
| TiO <sub>2</sub> - Cu-C-750-40s | 750 | 40 | <u>N/A</u> | <u>P</u> | <u>29.92</u>  |
| TiO <sub>2</sub> - Cu-C-800-40s | 800 | 40 | <u>N/A</u> | <u>P</u> | <u>29.92</u>  |
| TiO <sub>2</sub> - Cu-C-850-45s | 850 | 45 | <u>N/A</u> | <u>P</u> | <u>29.92</u>  |
| TiO <sub>2</sub> - Cu-C-750-45s | 750 | 45 | <u>N/A</u> | <u>P</u> | <u>29.92</u>  |
| TiO <sub>2</sub> - Cu-C-800-45s | 800 | 45 | <u>N/A</u> | <u>P</u> | <u>29.92</u>  |
| TiO <sub>2</sub> - Cu-C-850-50s | 850 | 50 | <u>N/A</u> | <u>P</u> | <u>29.92</u>  |
| TiO <sub>2</sub> - Cu-C-750-50s | 750 | 50 | <u>N/A</u> | <u>P</u> | <u>29.92</u>  |
| TiO <sub>2</sub> - Cu-C-800-50s | 800 | 50 | <u>N/A</u> | <u>P</u> | <u>29.92</u>  |
| TiO <sub>2</sub> - Cu-C-850-55s | 850 | 55 | <u>N/A</u> | <u>P</u> | <u>29.92</u>  |
| TiO <sub>2</sub> - Cu-C-750-55s | 750 | 55 | <u>N/A</u> | <u>P</u> | <u>29.92</u>  |
| TiO <sub>2</sub> - Cu-C-750-60s | 750 | 60 | <u>N/A</u> | <u>P</u> | <u>29.92</u>  |
| TiO <sub>2</sub> - Cu-C-800-55s | 800 | 55 | <u>N/A</u> | <u>P</u> | <u>29.92</u>  |
| TiO <sub>2</sub> - Cu-C-800-60s | 800 | 60 | <u>N/A</u> | <u>P</u> | <u>29.92</u>  |

---
